# Supplementary material for: Pattern recognition receptor mediated downregulation of microRNA‐650 fine‐tunes MxA expression in dendritic cells infected with influenza A virus
Source: PubMed Central journal article supplement (PMC4738369; doi:10.1002/eji.201444970), 2015-10-30
Supplement: EJI-46-167-s001.pdf [file EJI-46-167-s001.pdf]

# European Journal of Immunology

Supporting Information

for

**DOI 10.1002/eji.201444970**

Tica Pichulik, Elham Khatamzas, Xiao Liu, Oliver Brain, Magno Delmiro Garcia, Alasdair Leslie, Benedicte Danis, Alice Mayer, Dilair Baban, Jiannis Ragoussis, Alexander N. R. Weber and Alison Simmons

**Pattern recognition receptor mediated downregulation of microRNA-650 fine-tunes MxA expression in dendritic cells infected with influenza A virus**

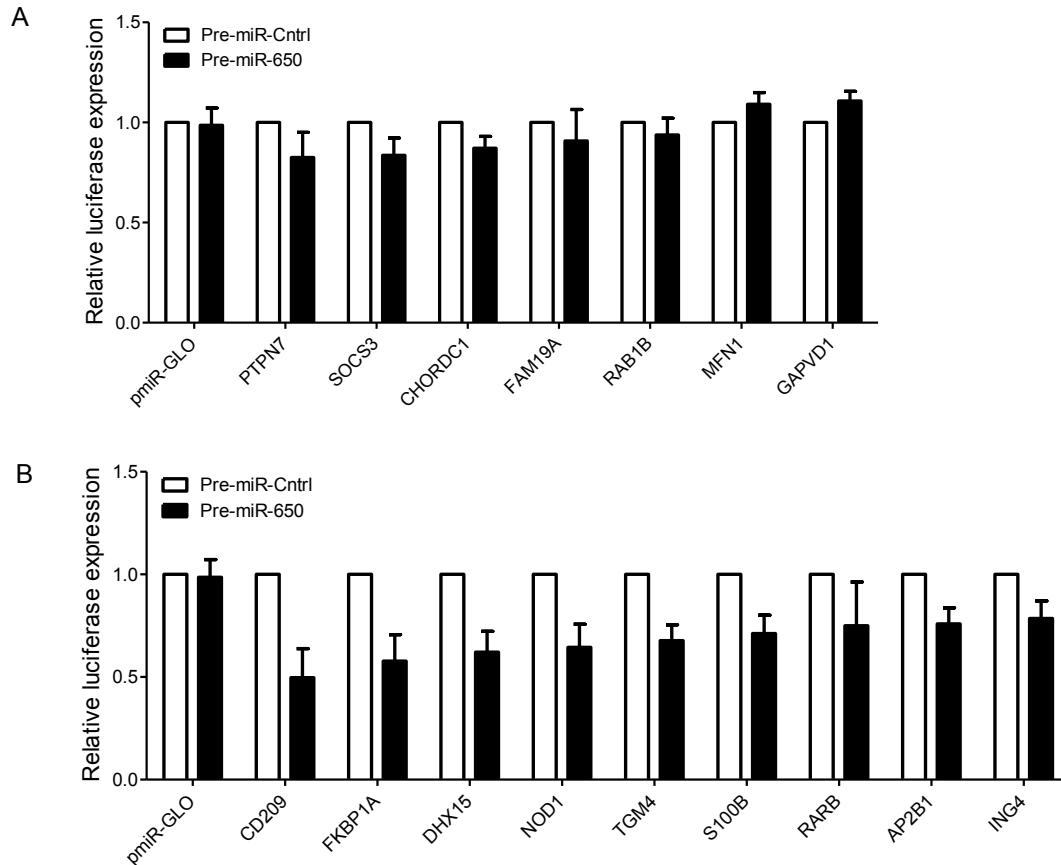

**Supporting Information Figure 1 | Results of 3'UTR luciferase reporter assay screen.** (A) pmiR-GLO constructs that remained unresponsive to miR-650 pre-miR ( $p > 0.05$  and regulated less than ING4). (B) Genes which were not significantly regulated ( $p > 0.05$ ) but relative luciferase expression was repressed below the level of that of ING4, a validated target. (A, B) pmiR-GLO empty vector served as negative control. Firefly activity was normalized to Renilla and is expressed relative to control pre-miRNA. Measurements were performed in triplicates or quadruplicates and data is represented as mean  $\pm$  s.e.m. from three independent experiments. Statistical significance was tested using a paired Student's *t*-test. None of the shown targets were considered significant,  $p < 0.05$ .

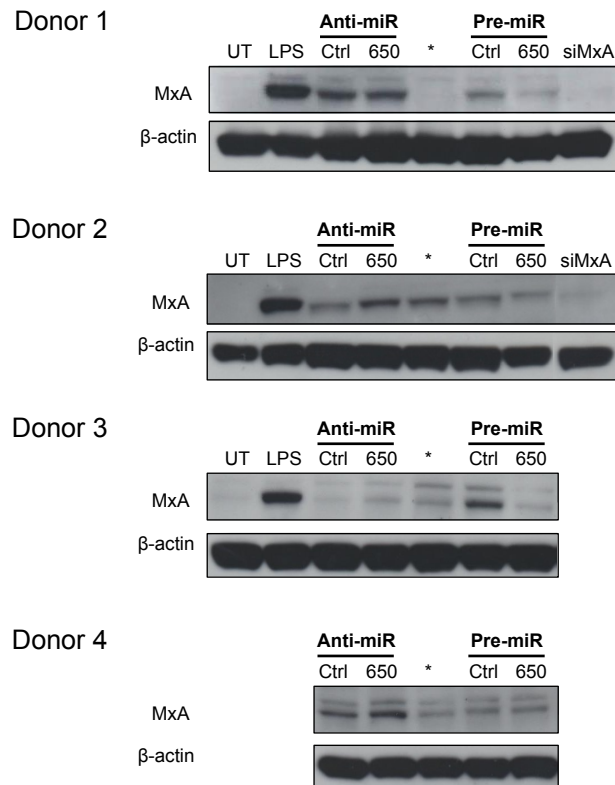

**Supporting Information Figure 2 | Effect of miR-650 on MxA expression levels in MDDCs.** MDDCs were transfected with miR-650 pre-miR, anti-miR, an siRNA against MxA or corresponding scramble controls using electroporation. After 24 or 48 h MxA expression was measured by immunoblot. UT = untransfected + unstimulated, LPS = untransfected + 24 h LPS. Data from four donors shown.

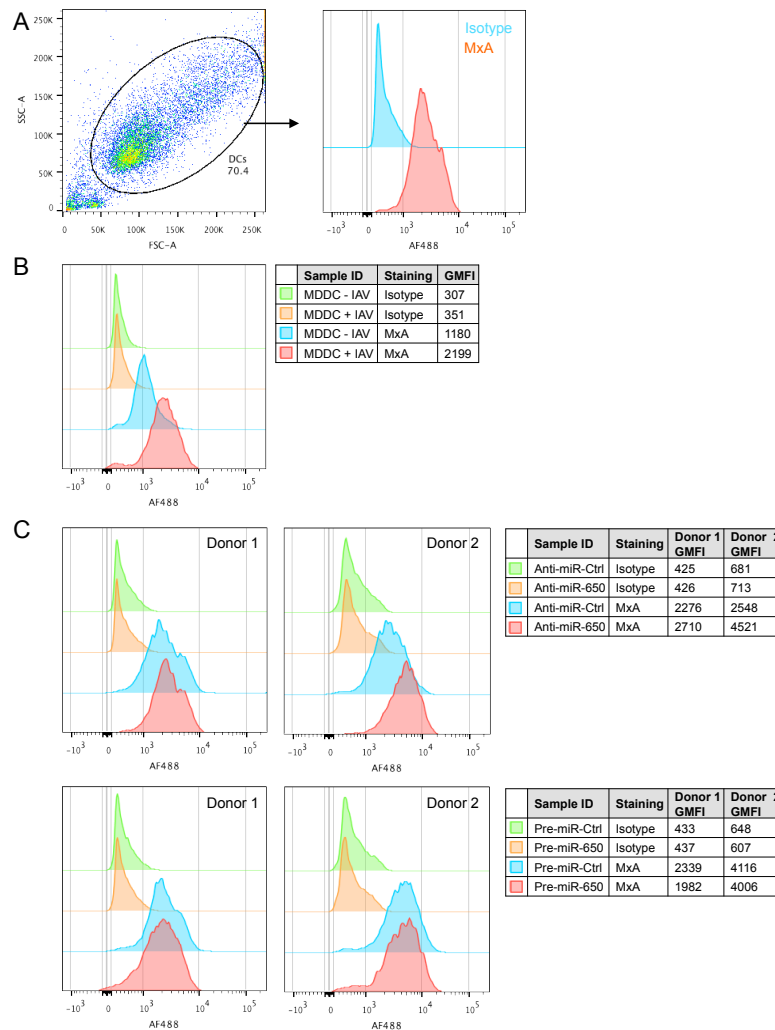

**Supporting Information Figure 3 | Quantification of MxA expression by flow cytometry. (A)** Definition of MDDCs by FSC and SSC and example of AF488 signal of cells stained with anti-MxA antibody or matching isotype control. **(B)** Induction of MxA expression 6 h post IAV infection (40 HAU/ml). One representative donor out of three shown. **(C)** Effect of miR-650 on MxA in IAV-infected MDDCs. Cells were transfected with pre-miR-650, anti-miR-650 or their respective controls using Viromer GREEN. After 48 h cells were infected with IAV (40 HAU/ml) for 6 h, stained for MxA or matching isotype control and analyzed by flow cytometry. Two representative donors out of four shown.

**Supporting Information Table 1 | List of candidates chosen for the 3'UTR screen including *in silico* target site information.**

| Gene ID  | TargetScan |               | Miranda  |        | MicroCosm |       |
|----------|------------|---------------|----------|--------|-----------|-------|
|          | No. b.s.   | Context score | No. b.s. | mirSVR | No. b.s.  | Score |
| AP2B1    | 1          | -0.27         | 2        | -0.70  | NR        | NR    |
| ARHGAP31 | 1          | -0.37         | 2        | -0.27  | -         | -     |
| ATG12    | 1          | -0.34         | 1        | -0.51  | -         | -     |
| CD209    | 3          | -0.51         | 6        | -0.45  | -         | -     |
| CHORDC1  | 1          | -0.22         | 1        | -0.59  | -         | -     |
| DAGLA    | 2          | -0.09         | 4        | -0.46  | -         | -     |
| DDX17    | 2          | -0.39         | 2        | -0.47  | -         | -     |
| DHX15    | 1          | -0.23         | 1        | -1.32  | -         | -     |
| FAM19A   | 1          | -0.40         | 1        | -0.68  | -         | -     |
| FKBP1A   | 2          | -0.55         | 3        | -0.87  | -         | -     |
| GAPVD1   | 1          | -0.37         | 2        | -0.48  | -         | -     |
| GIN1     | 1          | -0.47         | 1        | -0.79  | -         | -     |
| ING4     | 1          | -0.35         | 1        | -1.03  | -         | -     |
| IRF3     | 1          | -0.24         | 1        | -0.28  | 1         | 18.40 |
| MAP1LC3C | 1          | -0.24         | 3        | -0.24  | -         | -     |
| MFN1     | 1          | -0.45         | 1        | -0.97  | -         | -     |
| MLLT10   | 1          | -0.02         | 1        | -0.34  | -         | -     |
| MXA      | -          | -             | -        | -      | 1         | 18.56 |
| NOD1     | 2          | -0.37         | 2        | -0.24  | -         | -     |
| PCSK7    | 3          | -0.53         | 3        | -0.53  | 1         | 18.90 |
| PTPN7    | 2          | -0.53         | 3        | -0.20  | -         | -     |
| RAB1B    | 2          | -0.05         | 2        | -0.65  | -         | -     |
| RARB     | 2          | -0.40         | 2        | -1.01  | -         | -     |
| S100B    | 2          | -0.53         | 0        | -0.00  | -         | -     |
| SIRPB1   | 3          | -0.63         | 4        | -1.76  | -         | -     |
| SOCS3    | 3          | -0.04         | 3        | -0.53  | -         | -     |
| TGM4     | 1          | -0.37         | 1        | -0.97  | -         | -     |
| TMED2    | 1          | -0.37         | 1        | -0.81  | -         | -     |
| TRPC5    | 1          | -0.44         | 1        | -1.03  | -         | -     |

No of b.s: number of binding sites predicted  
 NR: gene not found  
 -: no binding sites found

**Supporting Information Table 2 | Primers used for amplification of 3'UTR sequences with restriction sites in capital letters.**

| <b>Primer</b> | <b>Sequence</b>                                     |
|---------------|-----------------------------------------------------|
| CXCL10 FWD    | TCGCTAGCaccagaggggagcaaatcgatgc                     |
| CXCL10 REV    | AGGTCGACtagtcttctaataattccaggagagtagcctc            |
| IFIT2 FWD     | TCGCTAGCgaatagagatggtgcccactagg                     |
| IFIT2 REV     | AGGTCGACtggaatcagtgacttttattctcataacagagg           |
| GCH1 FWD      | TCGCTAGCcttcattcagtggtctgcagaacc                    |
| GCH1 REV      | AGGTCGACaatagaccacactcaggaaacatacatactc             |
| ING4 FWD      | TCGCTAGCtaaggccctggattccaacacagtttc                 |
| ING4 REV      | AGGTCGACgaatgctcagcatgttactaaaacagtgctc             |
| MAP1LC3C FWD  | TCGCTAGCccatgctgggaaggatgtgctc                      |
| MAP1LC3C REV  | AGGTCGACggacacctgcccacatgcagg                       |
| SOCS3 FWD     | TCGCTAGCgggtaaaggcgcaaggcc                          |
| SOCS3 REV     | AGGTCGACgtgctctttataaataactgaaatgttcttctcg          |
| CD209 FWD     | TCGCTAGCagaactcaccctttaaagctacagttc                 |
| CD209 REV     | AGGTCGACtcaaggcagccaagcaaggacac                     |
| SIRP1B FWD    | TCGCTAGCtgacctcagctctgctgctc                        |
| SIRP1B REV    | AGGTCGACaatgaagtgcattgagcagagactgaagg               |
| ARHGAP31 FWD  | TCGCTAGCccaagaatggaagctgtgaggagac                   |
| ARHGAP31 REV  | AGGTCGACcggagagacaaaacaagaactagatttaag              |
| IRF3 FWD      | TCGCTAGCccctcgctcctcatggtgctc                       |
| IRF3 REV      | AGGTCGACgatcatagcaggaaccgattttggtgag                |
| RAB1B FWD     | TCGCTAGCaggggcacatggagtgaggacag                     |
| RAB1B REV     | AGGTCGACaaacctcagctcaccgagggg                       |
| NOD1 FWD      | TCGCTAGCaggatgcttctgttcatggggttttgc                 |
| NOD1 REV      | AGGTCGACaagagtgcttctgattttatacaaaatgagctggc         |
| AP2B1 FWD     | TCGCTAGCcaagactggctccagaccctcaacc                   |
| AP2B1 REV     | AGGTCGACgtaaatgtagtttattgacgaagacacaagg             |
| ATG12 FWD     | TCGCTAGCccacaagaaaaactgctactacatgaaatgg             |
| ATG12 REV     | AGGTCGACgtgttattccaatattaggacatagtaggcactc          |
| CHORDC1 FWD   | TCGCTAGCtgggagatggaaggagctattac                     |
| CHORDC1 REV   | AGGTCGACttgacaaccgatagtaaacatattgctacc              |
| DAGLA FWD     | TCGCTAGCaccccagttgctggccagc                         |
| DAGLA REV     | AGGTCGACgtgcttctacatccagttatacacagctc               |
| MLLT10 FWD    | TCGCTAGCcaagacttagtgataaaactgggctgtagc              |
| MLLT10 REV    | AGGTCGACacattttgtacattttaatacatggtggaattttacatctagg |
| TRPC5 FWD     | TCGCTAGCtcaagccctaatcatctgttctggaactc               |
| TRPC5 REV     | AGGTCGACgtgctgtaatatgagtaggaatgtagccc               |
| FKBP1A FWD    | TCGCTAGCaggaatggcctcctcccttagctc                    |
| FKBP1A REV    | AGGTCGACctgagaaaagccggcataaagcacttttattgc           |
| PTPN7 FWD     | TCGCTAGCcccctgcccacctccgggtg                        |
| PTPN7 REV     | AGGTCGACgagtcagtcacccaagaagctttattttcccac           |
| GIN1 FWD      | TCGCTAGCtattcattaaaaactgtatagaagaatctcttggc         |
| GIN1 REV      | AGGTCGACggctgaaacaatagaattttattgtctcagag            |
| MFN1 FWD      | TCGCTAGCcaatagagatgcttggtagccatgtagaggag            |
| MFN1 REV      | AGGTCGACgaaactggtaggacatttccaccagc                  |
| S100B FWD     | TCGCTAGCattagaagcagccaaaccttctgtaacag               |
| S100B REV     | AGGTCGACctttttattgaaagcaggccctgagc                  |
| PCSK7 FWD     | TCGCTAGCctcaggccctgacagtggtgg                       |
| PCSK7 REV     | AGGTCGACttggaaggttttttttggaaaagctgtgacg             |
| PPP2R1B FWD   | TCGCTAGCgaggagcaggaggaaaaggcc                       |
| PPP2R1B REV   | AGGTCGACgaaactcatatcagtttaagagaacaactctggag         |
| RARB FWD      | TCGCTAGCacattttctagctacttcaaacattcccag              |
| RARB REV      | AGGTCGACtatattttattcttggccaggagactccatgg            |
| TMED2 FWD     | TCGCTAGCcaagcctctcctgatgatcccaactcag                |
| TMED2 REV     | AGGTCGACttaccgaaacctggggcatattagatacaacc            |
| DHX15 FWD     | TCGCTAGCctcagtgctagaactgaagttatgagaggac             |
| DHX15 REV     | GGTCGACggccaaaattagtaaaatagactttatgagtagctg         |
| TGM4 FWD      | TCGCTAGCcttctgctgctggtggagccttagtg                  |
| TGM4 REV      | GGTCGACagtttaattaaagcttattgatcattgagcaaatctctgg     |
| MXA FWD       | TCGCTAGCcccacactgtccagcccctgta                      |
| MXA REV       | AGGTCGACgtctgctgagaatgagtttatt                      |
| EBF3 FWD      | TCGCTAGCggactctgtttacctccgacgc                      |
| EBF3 REV      | AGGTCGACcagataaaacaacttattgtaggctttaaagc            |
| FAM19A FWD    | TCGCTAGCccaggagaaatcaagtatcctcaaggc                 |
| FAM19A REV    | AGGTCGACatgaaagagagctcattttatataccaaattttacc        |
| GAPVD1 FWD    | TCGCTAGCcaagccaaggccccaaggcc                        |
| GAPVD1 REV    | AGGTCGACgcaatgtccacatctcatattttccacagtg             |

**Supporting Information Table 3 | Sequencing results of the 28 3'UTR inserts clones into pmiR-GLO vector.**

|                        |                                                                                                                                                                                                                                                                                                                                                                                                                                                                                                                                                                                                                                                                                                                                                                                                                                                                                                                                                                                                                                                                                                                                                                                                                                                                                                                                                                                                                                                                                                                                                                                                                            |
|------------------------|----------------------------------------------------------------------------------------------------------------------------------------------------------------------------------------------------------------------------------------------------------------------------------------------------------------------------------------------------------------------------------------------------------------------------------------------------------------------------------------------------------------------------------------------------------------------------------------------------------------------------------------------------------------------------------------------------------------------------------------------------------------------------------------------------------------------------------------------------------------------------------------------------------------------------------------------------------------------------------------------------------------------------------------------------------------------------------------------------------------------------------------------------------------------------------------------------------------------------------------------------------------------------------------------------------------------------------------------------------------------------------------------------------------------------------------------------------------------------------------------------------------------------------------------------------------------------------------------------------------------------|
| <p><b>AP2B1</b></p>    | <p>AAGACTGGTCCAGTACCCTTCAACCATGCTGTGATCGGTGCAAGTCAAGAAGTCTTAACTGGAAGAAT<br/> TGTATTGCTGCGTAGAATCTGAACACACTGAGGCCACCTAGCAAGGTAGTAAGTCTAACCTGTGCT<br/> AACATTAGGGCACAACCTGTTGGATAGTTTTAGCTTCTGTGAACATTTGTAACCACTGCTTCAGTACCT<br/> CCCACCTCTTGCCACCTGCTGCTGCTATCTGTCCTTACTTGTGGGCTTCTCCATGCTGTGCCAATGGCTGG<br/> CTTTTTCTACACCCTCTTTGAGTGTAGTTGGTATTTTGAATTGAGAGCTCATTCAAAGCAGAAAAA<br/> GACAACAAATATTAAGCAAGGAAAAGTGAACGAAACACTGCACCTTACTGTTTTATACTTTGTACA<br/> TATGAGAAATCAAGGGATTAGTGAACCAAGTAGAAAGCATTGAAATGACTGCTAATACACACAGTCC<br/> TGGAGGCAGAGATGCAGTTACCTACCCTAGCTTTTGTATGGGTTCTTACCTGTAGTAGCCTTATCCCTG<br/> GTCATTTGGATTTTCAGTTTGTCTTTTTCTTTTTTCCCCTCAAACCTCCTTTTCTTGGCCAAGCCTTCATG<br/> CTTCCCCCTTCCATATTATAATCTCATTGATTGCTGCTGCAAGTGGGAACGGTGTATCTTGAATGATG<br/> TTTCAGTGTGC[...]CCTTCTGGGACTTATCCTGGAGTCAAGTGTGATAACAAGTGTGAGGAAAGTTTACA<br/> CTGCAATAGTGTCTCATCTCAAAGCAAACCTATCATTCCAGAAGGAAAAGTGTGTCAGGGCAAGCAGA<br/> CAACAAATTTCTATCAGAATATGTCCTCAACCCCGAAACAAGGCTTCTCAGCCTCCCCACAGTG<br/> ATGGATAACAGTCTCTATTCTCAGTGCCTGACTGAGCCAAACCCATGAACCTTCTACTCCTTTGGGGAAG<br/> CCACTCCCATCACACCCCTGAGCAGAGTTAGGGAGGAATTCTACTTCCATAAAAAGGACCTCTCTGAG<br/> AGGCAAAACCTGTTGCCTCCACCACGGCTTCCCTCTGGCTCATTCCAAGCTTGGCCAATTTGGGGAAGT<br/> GGGATGGAGGTTGCCCTGCATCCCCCTCTGCTGAGTGTGTCTTTGAATGTGACGTGGCATCATA<br/> CAAAGAGCAGGAGAAGCAAACACCCAGAAGTCTTTGCTGGTCAAGAGATTCCCTGAGTGTCTGCTCA<br/> CCCAAGCCTGCTCTGTGTCTGTGTTGTAAGCTTGAAGTCTGAGACTCTGGAAGAAATGGGGAGGGGGCAGG<br/> GGAAATGTTGCCCTAAGAAATGCTTCTCATTCTCTGTTCTTATTGGGTCTGTTTTCGGGAGGGTGGGG<br/> GTTGGGGGAAGCTTGACCTTGTGCTTCTGCAATAAACTCACATTTAC</p>                           |
| <p><b>ARHGAP31</b></p> | <p>CCAAGAATGGAAGCTTGTGAGGGTAACTGTGGCTTATTCTTACAAAAAGTGAATAAAGGAGACTGAC<br/> CCCTGACAACATGGTAGGCACTGTATACATACTGTTTTGTTTTGTTTTTAGAGACGGACTCTATGT<br/> TGCCAGGCTGTTATGGAACCTCTGAGTCAAGTATCCTCCACCTTGGCCTCTGAAGGTGCGAGGATT<br/> ATAGGCGTCACTACCACATCCAGCCTACACGTATTTGTAATATCAACATAGGACTAACCCAGCCACTG<br/> CCCTCTTAGGCCCTCATTTAAAAACGGTTATACTATAAAAATCTGCTTTTACACTGGGTGATAAATAC<br/> TTGGACAAATTTCTATGTATTTTGTCTGTTTTGCTTTGCTTTGTTTTGAGACGGAGTCTCGCTCTGCAT<br/> CCAGGCTGGAGTGCAGTGGCATGATCTCGGCTCACTGCAACCCCATCTCCAGGTTCAAGCGATTCTCC<br/> TGCCTCTCTGAGTAGCTGGGACTACAGGTGCTCACCACCACCCAGCTAATTTTTGTATTTTAGTA<br/> GAGACGGGGTTTACCATGTTGACCAGGCTGGTCTCGAACTCTGACCTGGTGTATGCTGCCACCCAGGC<br/> CTCCAAAGTCTGGGATTAAGGTGTGAGCCACCATGCTGGCCCTATGTGTTTTTAACTACTAAA<br/> AATTTTTTTGAATGATTGAGTCTTCTTATGGAACAACCTGGCCTCAGCCCTTGCGCCCTTACTGTGAT<br/> TCCTGGCTTCATTTTTGTCTGATGTTCCCTCTGCTCCAAATCTCTCTCCAGTACACCAGTTGTTCTCC<br/> CCCACCTCAGCCCTCTCTGCATCTCCTGTACCCGCAACGAAGGCTGGGCTTTCCACCCCTCCCTCCT<br/> AGCAGGTGCCGTGCTGGGACACCATACGGGTTGGTTTACCTCCTCAGTCCCTTGCCTACCCAGTGAG<br/> AGTCTGATCTGTTTTTATTGTTATTGCTTTTATTATTGCTTTTATTATCATTAAAACTAGTCTTGT<br/> TTTGTCTCTCCG</p>                                                                                                                                                                                                                                                                                                                                                                                                                                                                  |
| <p><b>ATG12</b></p>    | <p>CCACAAGAAAAATCAACTTGCTACTACATGAAATGGATTTTACCGAAGAGACAGCTCTGAAAAGTTTT<br/> GATGCTTGTGGCAAGAGACTTAAACAGATGTGATCTATTTAGTATGTGCTACTCTATGTTTATGCATAAG<br/> AAAACATCCATAGCATGAATGGACTCAGAAAAATGTGATTTGTATTAATGCACCAGTCACTATAAAGA<br/> TGGTCATGATAGTACACCCATTGCTCCTACTTGTACTATTATTGCTGCAGATCTGCCTCAAGGTTGAAA<br/> AGGAGACTAAGACTGTATAAACATCTTATTGTGAGTCTCAAATGACTGAAATGTTTTATGTTGAAA<br/> AGTTAATACTAAAGGTTCTTTTTTTTAAATGTTTACATTTATCTCTATGTTTACCTTTTTAGTCACT<br/> GACCTGCTGGCTGAATACCTCAAATAGTCCAGTAGAGGGCAGTCCACCAGGCAGAAAAGGTTAGGCGT<br/> TTTTGGTTTACATCTTGTCTGGGGAATAATAGGGGAAATGGCTGTTTTTGTAAATTTTAGCTAATATCTA<br/> GCCAGGAGAGCAAGCACATAGGACAGACTGAAAGACTGTAATTTTACACAATACACATGGCTTAATTAT<br/> TTTATTGGGATACAGAAAAATATAAATCTGGACAAATAAGTCATATACTGTTTTTCACTTCAACATTTA<br/> AGGATTTCTGAGTCCCAATCACATAACTGTGGTGTACTCTGTCAATTTATGTTGTCAAAAGCACTGTA<br/> TGAGTAAACCA[...]TGATTCAGATTTTAACTTTTTAAAGGCTATCTGAATCATTCAAGGAGAAGTACCC<br/> TTTCTCTATAAAAACACTTGAAGCAAACCTCACTATTAATCACTTATGCACTAGCTCCTCAGAGATCC<br/> GTGTCAGTATTCTGGTTTTTATCTGGTACCCACACACATAAATACTTAGTACATTTCTTATATGTAAA<br/> TAATTAGTAATGTAACACATCGAGTGAATGAAATTTGTGATTAGCAAAGTATGACAGCTAAAAACAAAGG<br/> AAATTTTGTATAGTTAAGTTTTTGTACAGCAGAAGGTAATGGAAAATTTTGAACATATGACAGTGT<br/> TTTAAATGCTTAAGTATATGAAGAATTTGTTCAATTGGTAAGAAAAGACCAACTGAAAAATAGGCAAA<br/> ACATACAAAATTTGATTACAAAAAGATACAAATGGCCAACAAAACATGAAACACCTTGAACCCATTG<br/> GTTACAAAAAATACAAATAAAAAAATGCTGACTGACAATAAAAAAATGATACATCTTGTATTAGCAGA<br/> GTTGTGGGGAAATCCTGTCATATTTGGTGAATAGAATATGAGTTGGTATATCACTTTTAGGGGGCCATT<br/> TGGAATATCAAAAACCTGAAACGTAAGTATAAATCTCAGTTTGTTCGTATAACCTGTCATTACATATT</p> |





|               |                                                                                                                                                                                                                                                                                                                                                                                                                                                                                                                                                                                                                                                                                                                                                                                                                                                                                                                                                                                                                                                                                                                                                                                                                                                                                                                                                                                                                                                                                                                                                                                                                                                                                                                                                                                                      |
|---------------|------------------------------------------------------------------------------------------------------------------------------------------------------------------------------------------------------------------------------------------------------------------------------------------------------------------------------------------------------------------------------------------------------------------------------------------------------------------------------------------------------------------------------------------------------------------------------------------------------------------------------------------------------------------------------------------------------------------------------------------------------------------------------------------------------------------------------------------------------------------------------------------------------------------------------------------------------------------------------------------------------------------------------------------------------------------------------------------------------------------------------------------------------------------------------------------------------------------------------------------------------------------------------------------------------------------------------------------------------------------------------------------------------------------------------------------------------------------------------------------------------------------------------------------------------------------------------------------------------------------------------------------------------------------------------------------------------------------------------------------------------------------------------------------------------|
|               | <p>CCTCCCATCACTGCCTGCTGGCTGCTCTCCAGGGGCCAGGTGGAGAGCAGTGCCCCCGACACATGTA<br/> TTCTCATCTGTGGTCCAGGCCGGCATCGTCTGGCCACCCCCAGATCTGGTGCTGTGGCCGGCCCC<br/> TGGGGTGCCCTGCCGAGGTGGCCTGCAGTGTACATGTTTACAGAAGCTGTGGGCTTGGCTCAG<br/> GATGTGTTCTGGGCTTGAAGCCCCCGCCAATCATGTGTTACAGTAGCCGCTCTGAGCAGGGCCCA<br/> AGGCAGCCAGGGGCTGGAGGGGCCAGAGGAGGGTGGGGTCAGGGCCGCCCTTCTCTGCCTTGTGC<br/> CTCTCATGCTGCCTCTCTGCCATGGGCTCTGGCACCAGGCCTGCCCTGCCTGCTGGCTACTTCTCG<br/> GCTTACCTTACCCCAAGGATCCTCACCACCAAAGGGTGGTGGGCACTGCTGTGACCACCCAGCTG<br/> CAGAGTCAG[...]CCCTTGAAGGATGGCCTGCTGCACGTCTCCCTCCTCCACCCATACCACACTGGGG<br/> GTCTGAGCCACCCCTCAGCCCCGTTCCGGCTCAGACCGACCCCACTCCATCCCCAGACTGCAGCACA<br/> AGTGC GCGGGCCTGCTCCAGGGCCTGGGCGACTCCATATGCAATCAGTAGCGAGCAGCCGGCC<br/> CCACAGACCCTCATGCACTCTTACGTGCCATTCTCCCAGACTTTTTTTGTACTTAATGTATGAAAGAT<br/> CCAAACTAATATTGCTGTAAAAAGGAGAGACAAATTAATATAGCTTATTCTATAAATATATCTGTATATA<br/> AAGGTTTCTGTATATTGTATAGAGCTGTGTATAAAGTGGATGTAGAAGCAC</p>                                                                                                                                                                                                                                                                                                                                                                                                                                                                                                                                                                                                                                                                                                                                                                                                                                         |
| <b>DHX15</b>  | <p>TTCAGTGCTTAGAACTGAAGTTATTGAGAGGACAGCTTTAAAAGATGAATGAAGTCAAAGTTCGAGTT<br/> GTGCTCTTACGTTGGTTGATAATGGCCTTTATTTGAAAGCTTTTTAATTTTCTTACAGTAAATATTCC<br/> ATTCTGATTTCAAAATTAACATTTATGCTCCCTTTTGTGTTGACACTGTAGCTCATACTGGAAAAGTC<br/> GATCAATGTTTTGCAGTTTATTGAAAGTAGTTCTATATAACAATGTTATAAGCATTCTTTAGAAAATGG<br/> TTGAAAATGCTTCTAAAATGTGATTATCGACCATGGTATGCATGATCGTTGTAATTGTTGACATTCCTTTT<br/> AGAAGTTGTGAAATGTTACAACCTGTGCTTATGTAGACACAATCTTCTGTCTCAGTACAGAGGCACTGAC<br/> TTCAATAAAGTCTATTTATACTAATTTTGCC</p>                                                                                                                                                                                                                                                                                                                                                                                                                                                                                                                                                                                                                                                                                                                                                                                                                                                                                                                                                                                                                                                                                                                                                                                                                                                                                             |
| <b>FAM19A</b> | <p>CCAGGAGAAATCAAGTGATCCTCAAGCTGATGACATTGAACATGCGCATAGAACTTAACTCAACTCC<br/> TGAGGTGATCTTGAAGATTTTTATACCCTGAAAGAGGCGCTCAATAGTCTATTTCCAAGGGATTTTCAT<br/> GGCCTCTTCTTGAATCAAGACTTTTTAAAAGTCAGACATGAACTTGCATGTCATGAAGATTTTCAGCAGA<br/> TTTGAAGTGTGTTCAACTGTAAATTTGTTAAAAGAAATTTGAAGTCACTGCTGAGGAGCTGGTGAAGAG<br/> TTGTTTTTTTCAGGGTGTGTTAGAGACAGTCACCTTTTGTGTTATTGGCTCCAGATGTGACTACTTTTCT<br/> TGTTTCTGCAAGCTGTATCCCAAGTGCCTGCTCTTCTGCTGGATGTGTTCTGGGCTCATGTTTCTT<br/> TGCTAGTGGGACTACACATGGCTTAAATGACATTTCTTTGAGAATTTTCTCTGGCATGGTGTAGACT<br/> GAGACAATTTTATATATCCTAATCTGGAGCTCAGAAAGCCTACATGTTTTAACATCTTAAAGTTGCTT<br/> TTGTTAAAGGAATGAAATATATATCCATTGGTAATAATGTTGGCAAGTAATAGTTATCTGAATAAATCA<br/> ATCATATAAGAATGTATAGACAAGCTGACATATTTCCCTAAGGCTAACAACACCCTGCTGAAGCTCTTTG<br/> TCAATAGGTAGTAGTTAGAAGTGGATTGCCATTTTCTTATATAATACTTTGTACCTTAGAGCACTCTC<br/> CCTTCTG[...]GAGAGAAGAAAAGAAAGTGCATAGCCATTCTGTAACAATATTGTGTAACACTATAGTTT<br/> GAAGGAATGCAAGGAGAAGGATTTCTGTGTTTACTCATTTTGTAGGCTGTTGAGAACTTCAAAGTTC<br/> GTCCTGTTAGAATTTCCATCATGGAAGGTGGTATGGAAGAAGGTATGAAACTTTGTAATTTCAAAAA<br/> CTCACTGACGTGGTCAAGTGTAGACATACGTTGGTTTCCAGGATGGAGGCCATATATCCTGGGGAGCTTT<br/> GGTCTATTAGTTTGTGACAATATTCAAAGGCCAAAACTACTCAGACACTTTCTGGGAAGAGCAACTA<br/> AAAATGTAATAATGGTTAAAAATAAATCTGAAAAGTATGTATCTCACATTGAACTAAAATCCACTGTCT<br/> CATAAGTTCATGGAATGAAATGGCTTTCTGCTCCATTTAATCATGCATAAAAATGAATTAGATGGCTTT<br/> GAGTGGATTTTCAAAATGGCTCAAGACTATATGAAATTATAAAAAAAGTTGCCCTGGGGTTTCTGCAT<br/> CAATTAGAATATCATTAAATTTCTTTGTAACCAAGTAAAAACTATACTTTTGGAAATTATGAATTTGTC<br/> TAGGTTTGTGAGATTTGAAATTATACATCATGCTTCTCATTTTTTAACTATGTTCTTTAAATCAACT<br/> GGAACTCTGTATTATACAAGTGAATACATGCATATAATAGAAAAAAGCATGGAATTTCAAATATA<br/> CTAACTAGATTATCCCAAGTAGATTAATGTTGTGACTATTGAGAAAAGTGAATAAAATTTGGGATATAAA<br/> ATGGACTCTCTTCAT</p> |
| <b>FKBP1A</b> | <p>CAGGAATGGCCTCCTCCCTTAGCTCCCTGTTCTGGATCTGCCATGGAGGGATCTGGTGCCTCCAGACGT<br/> GTGCACATAAATCCATATGGAGCTTTTCTGATGTTCCACTCCACTTTGTATAGACATCTGCCCAACTGA<br/> ATGTGTTCTGCACTCAGCTTTGCTCCGACACCTGTTTCTCTTCCCTTTCTCCTGGTATGTGCGTTT<br/> ACCTAACTATATGCCATAAACGTCAAGTTATTCATTTTACTTTTCAATTTGGGGTGAAGATTCAGTTTC<br/> AGTCTTTTGAATATAGGTTTCCAATTAAGTACATGGTCAAGTGTAAACAGCACAAGTGATAAGTTAACGT<br/> TAGGATAGGAATTGGTGTGAGGGGGTGAAGAATATTTTATTTTAAATTTTGGATGAAATTTTATC<br/> TATTATATATTAACATTTCTGCTGCTGCGCTGCAAAACCATAGCAGATTTGAGGCACTGTTGAGGACTG<br/> AATTATTCTCAAGTTGAGAGATGTCCTGGGTTAAATTAAGCCCTACCTAAAAGTGGGTTGGGGAT<br/> GGGGGAGAGCCTTTGCCTCA[...]TCAATTGAAGGTGCTGTTGTAGACTTAACCCAGTGAAGGCCCA<br/> GCCATCATGACAAATCCTTGAATGTTCTTAAAGAAAATGATGCTGGTCACTCCAGCTTCCAGCATCTCCTG<br/> TTTTTGTGCTTGGCTCCCTGCTGATCTCAGAGTTTCTGGCTTTTCTCCCTCAGCCACTTCTACCC<br/> CTTTGCTGCTGTTAGTGAATTTGGTGGAGGAATCGTTGCTGCCCTTCCCTCAGCACCATATATGA<br/> GTCTCAAGTTTTATTATGCAATAAAGTGCTTTATGCGGGCTTTTCTCAG</p>                                                                                                                                                                                                                                                                                                                                                                                                                                                                                                                                                                                                                                                                                                                                                                                                                          |
| <b>GAPVD1</b> | <p>CAAGACCAAGGCCACCAAGGCAGCAGACTGTTAATCAGACAAACAGATCTCTGAGAAGGTGCATCAG<br/> CTGCTTTGAAGGCTGAAGATTGTTTTGTATGATACTGCACAGCATCAGGCATTTTAAAGCAGATCTTTAC<br/> TAAACAGGTTAATGAGCTAACAAGCAGGTTCTCTGCTTTTGGGCTTTTCTTTCTGAGTTGCATATTCT<br/> ATTTTCTGTCCCAAGTAGAGACTAGTACTACAAAAGGGACCACATTTTCAAGTATTTCTAAGTATAA<br/> AAAACAAAACAAAATCTTAGGAAATGTCTAGACCTCCATCTTGGATTCCCTTTCTTTCTTTATTTT<br/> AAAAAAGAACAGTACCCTCTTTAAGATGCTGTCTTACATTAATGAGCATCTAATGGAAGAAGGTAT</p>                                                                                                                                                                                                                                                                                                                                                                                                                                                                                                                                                                                                                                                                                                                                                                                                                                                                                                                                                                                                                                                                                                                                                                                                                                                                                                                                            |

|                     |                                                                                                                                                                                                                                                                                                                                                                                                                                                                                                                                                                                                                                                                                                                                                                                                                                                                                                                                                                                                                                                                                                                                                                                                                                                                                                                                                                                                                                                                                                                                                                                                                                                                            |
|---------------------|----------------------------------------------------------------------------------------------------------------------------------------------------------------------------------------------------------------------------------------------------------------------------------------------------------------------------------------------------------------------------------------------------------------------------------------------------------------------------------------------------------------------------------------------------------------------------------------------------------------------------------------------------------------------------------------------------------------------------------------------------------------------------------------------------------------------------------------------------------------------------------------------------------------------------------------------------------------------------------------------------------------------------------------------------------------------------------------------------------------------------------------------------------------------------------------------------------------------------------------------------------------------------------------------------------------------------------------------------------------------------------------------------------------------------------------------------------------------------------------------------------------------------------------------------------------------------------------------------------------------------------------------------------------------------|
|                     | <p>GAGTTGCACTGAGGATTAGAATAGTGGTGCCTTAGTGGCATTATCTATAAATACACTCACCTAAATTGA<br/> AAGCTAAGAAGGAAATGTAATATAATATATATTTATATTTGATGTAATATGGACATCTGCAGATTCTAA<br/> TAAACAAGGACTATTGCTGATAGTAGGCTGTGACATACTGTCTTGAAATGGTTTCCTTGACAAAAATTT<br/> AAGCTGAGCTTAAAAGCAAAAAACAAAAAGTACACAGAAATATTTATTAATAATGTAATACAGTTTATTG<br/> AATTTCTAGGTATGGAGTTTGTATGGACAGGGCTGCCTTAAATGAGTGTGAA[...]TATTTTATTTTATTTT<br/> ATTTTTTTGAGACAGAGTCTCACCTGTTGCCAGGCTGGAGTGCAATGGTGGCATCTTGGCTCACTGCA<br/> ACCTCCACCTCCCAGTTCAGTGATTCCCCTGCCTCAGCCTCGCGAGTAGCTAGGACTACAGGCGCATGT<br/> CACCAAGCCCCGGCTAATTTTTGTATTTTAGTAGAAAACGGGGTTTACCATTGTTGGCCAGGATGATCCTC<br/> AATCTCCTGACCTGTGATCCACCCGCTTGGCCTCCCAAAGTGCGGGATTACAAGCGTGAACCACCTCG<br/> CCCAGCCAGAACTAGATTTTCTTTATGCCTCCACCCCTTCTTATTCATTTACTTTACAATACCAAATAAC<br/> AAATTGCATAGGAGTGTGGGATGTGGTTTCTGCCTTCTAGAGAGAGATCAGAATTAACCTAGTACTATG<br/> AAATGTCCTTTTGAATGTTAGGTCAAGAAATCCATGTACAGAGTCTGTCATTCATTGGCTGTAACCTGC<br/> AAACTGCCTTGTATTAGAAGTAAATCCCATCGTAAATACATCAGAGGCCAGCTGTGTGATTTCTGAG<br/> ACCTAGATGAGAGTCCATTTACTTCAGCCTTTGATTCAGTAAATGTTAAGCAGCAGAAGACTTCGAATGG<br/> TTGAAATTCATTGTTACAGGATTTAACTCATAAACCAATGAGAGATTTTTTTTTCTCTGCAATGGTTGCT<br/> AAGTCTATTCATGTTAACACTGTGGAATAAATATGAAGATGTGGACATTGC</p>                                                                                                                                                                                                                                                                                                                                                                                                                                      |
| <p><b>GCH1</b></p>  | <p>CTTCATTCAAGTGTGTCTGCAGAACCATAGCTTCCACGCACCTGAACGAGCAGAGAATGAACGACGG<br/> TGGAAGACATTATGAGCTGTGTCCAACGTTTTAACCAAAGCGTATCGTACCAACGATCTGTGAAAATGC<br/> ACTGGAAGCTTCTGGTCCCGTTTTCTTTGTGGTCTATGTGGGCTTGTCCCTATTGTAACCTCCGTATAGA<br/> TGGTATAGGTATTTAATCCTGGAAGCTGTGGCTTATTAATGATTATCTAAAATTTCTCCATTTGGGGC<br/> AGCGTGGGCCAAATTAACAACAAACAAACCGCAACTCCTCCACAGAAACACAAACACAGTTATCCATG<br/> AAGTTTAGTATTTGGTTGACATAGTGCTCTCAAATTCATCCATTACCCTAAAAGTAATAACTTTGATGC<br/> TTGCTTTAACTTAGTCCCATCTCTGCCACTTTGATGCTATTTGGGTTATGATGGGGCAAGATGGCAGAG<br/> GTATTGGGTTTTTTTTGTTTTTCCATTCTCTACTTCTGTTTCTAGCTTTTTCTTTCTGGAGTTAAAGT<br/> ACAGTGATGGTTGGCTGAGTACCTTTTTAACTAGCCAGTATAAACATTAGCCTGCTTAATATTTAGA<br/> CATTTATAGGTAGAATTCTGAGCACTCAACTCATGTTTGGCATTAAAGTAAAAACAAGTGTGACTTCG<br/> AGGACCAAAGAAATGTCAGCTATACATTTATCTTTATGAACCTATTTATATTCTTTTTAATGACTCGTT<br/> GTTCTAACATTTCTAGAAAGTGTCTTTATAAAGGTCTAATGTATCCACAGGCTGTTGTCTTATTAGTAAAT<br/> GCAAAGTAATGACTTTGTCTGTTTACTCTAGTCTTTAGTACTTCAAAATTACCTTTTATATCCATGATCT<br/> TGAGTCCATTTGGGGGATTTTTAAGAATTTGATGATTTCAATACACTGTTCAAAATTAATTTGTTAATT<br/> TTATGATGAGTATGATGTTCTGAAGTTGGTCCTATT</p>                                                                                                                                                                                                                                                                                                                                                                                                                                                                                                                                          |
| <p><b>GIN1</b></p>  | <p>TATTCATTAACAAAGCTTGTATAGAAGAAGTATCTTGACACATTCTTAATGACTATATTCTGAAGGTTTATT<br/> TTATAGTCTTATCTAAAATTATGCCACATTTGAATATCAGTATACGTACATATGAAGGCCAAAGGAAGCA<br/> TGTAATATATAGAATTCACTTTTCTTCTAAAAGTGAACAGGCCAAAGCACCCCTACTTCTGGGAAATA<br/> AATTCAGCCCAAATCTCTCAAACCTTTGTATGGTTTTGGCACCGTTTCTAAGTTTTAAATTTCTGAAATT<br/> CTCTACCATTTAAACAGTAAGTTTGAACCTTGAATGGAATTGATAAATACTGAATCAACTGTAACAA<br/> TGAATGAAATGAAGCTTCTTTCTGTTTATTAGAATTTCTAAAACAAGATTGTATGAAAAAATATAGGG<br/> TTATTTAATAGGCTTTCACAGAATATTGGTAATTTCAAATTTCTAATTTGGTTAGATAGGGTCAAGGATTA<br/> GGGTCTGAAACTATGTATTGGTTGGGAAACAATTTGTTATTTTCACTATATATTAAGATAAAACCAT<br/> CGACCAGGCATGGTGGCCACACCTGTAATCCCAGCGCTTGGGAAGCCAAGGCAGGATGATCACTTG<br/> ACCCAGGAGTTCGAGACCAGCCTGGGCAACACAGGGAGACCCTATCTACAGAAAAATGTTAAAAA<br/> TTAGCCAGGTGTGGTGGCACATGCCTGCGGTCCCAGCT[...]AAACTATGTAAGCCATGTACAACACAAGT<br/> TAAGGCATGCTAAATGCAAGACAGGTGTAGATAATGTAATGAGGAGGCAAAAAGAGAGAAGTTG<br/> TTTTACATAGGAAATTTGTGTTTATCCTTATGGAAGAAGGATCATTAAAGCTTGAACCTGAAAGTGA<br/> TAGGATTTGGTAAATGGATACAAAAGAATTAGGGGAGAAGTAAATACACAGAAATGGAAGTAAATTTGTA<br/> ATGATTCATAAAAAGGCAGGGCTTCTGTTGTCTACACTGCCTCGGGTATAAAGTGAAGAAGCAAGATA<br/> ATGAGGGATAAAGCTGAAAAGGTAAGTAGGAAACCTTATGGAGAGCTTTGAATACTATTAAGGATTGA<br/> TATGTGCCCTCCAAAATTTGTGTTGAAGTCTTAACCCACCACCTCAAATGTGACCTTATTTGGAAA<br/> TGAGGTTGTTGCAAGTGAATTTAGTTGAGATCATATTTCAATAGGGTGGGCTCTAATACAGTATTACTGG<br/> TGTTCTGATAAAAAGGGGAAAATTTGAACACAGACTCAAGGAGAATGCCATGTGAAGATAAAGGCAGAG<br/> TTTAAGATTATGTTTCTATATGCCAAGAAATGACAGAGATTGCCAGAAAACCTACCAGAAGTTAGGGGAG<br/> AGGCATTGAATACATTTTTCTCATTCTCAGAAAGCAACCCCTGTCAATACCTTATCTCAGACTTTTGCTT<br/> CCAGAAGTGTGAGACAATAAAATTTCTATTGTTTCAGCC</p> |
| <p><b>IFIT2</b></p> | <p>GAATAGAGATGTGGTGGCCACTAGGCTACTGCTGAAAGGGAGCTGAAATTCCTCCACCAAGTTGGTATT<br/> CAAAATATGTAATGACTGGTATGGCAAAAGATTGGACTAAGACTGGCCATACTGGACAGGGTTA<br/> TGTTAACACCTGAATGCTGGGCTTTGAGAGAGCCCAAGGAGTTCTGGGAGAGGACCAAGTATGGGGG<br/> GTAGTCCACGGGCTTGGTGATAGAATTTCTCGATTGACTTCTTGGAGTGAATTTGACAGTGAACAT<br/> TTGCTTAGTCACCTTTAGTGGAGTAATCTACTGGGCTTGTCTATATTTATATAAAGCAGCCAAATCCTT<br/> CATGTAATATTGAAGTCCATTTTTGCAATGTTGTTCCATACTTGGAGTCATTTTGCATCCCATAGAGGTTA<br/> GTCCTGCATAGCCAGTAATGTGCTAAGTTCATCCAAAAGCTGGCGACCAAAGTCTAAATAGGGCTCAG<br/> TATCCCCATCGTTATCTGCTCCTTCTCCTCCTTCCAGTCTATCATCAACCTTGAGTATTCTACACA<br/> ATGTGAATTCAGTGCCTGATTAATTGAGGTGGCAACATAGTTTGGAGCAGGGCAGAGAACAGGAAG<br/> ATACATAGCTAGAAGCGCAGGGTACAAAAGCAATGTGTACAAGAAGACTTTTCAGCAAGTATACAGAG</p>                                                                                                                                                                                                                                                                                                                                                                                                                                                                                                                                                                                                                                                                                                                                                                                                                                                                                                            |

|                 |                                                                                                                                                                                                                                                                                                                                                                                                                                                                                                                                                                                                                                                                                                                                                                                                                                                                                                                                                                                                                                                                                                                                                                                           |
|-----------------|-------------------------------------------------------------------------------------------------------------------------------------------------------------------------------------------------------------------------------------------------------------------------------------------------------------------------------------------------------------------------------------------------------------------------------------------------------------------------------------------------------------------------------------------------------------------------------------------------------------------------------------------------------------------------------------------------------------------------------------------------------------------------------------------------------------------------------------------------------------------------------------------------------------------------------------------------------------------------------------------------------------------------------------------------------------------------------------------------------------------------------------------------------------------------------------------|
|                 | AGTTCACCTCTACTCTGCCCTCCTCATAGTCATAATGTAGCAAGTAAAGAATGAGAATG[...]TGAGAAAT<br>CACAAAATTCACGGTATGCTTGGAAACGATTGAGATTTTCTAGGTAGATGCTGAATAGCCTAGACATCAA<br>AGTTGGTGTGAACCAAAATAGAGTCAGCTGACCCAGCATCAGCCACACTCTGGGTTGAAAATGTTTGC<br>CTGTTGGAATTAATTAAGCTTAAGTATATATCAACATTATTTTATTGTGCAATTAACAATACAAATTC<br>ATGGTTTTTAAAGTAAAAATTTCTAACACTGTAACAACAGTTTTTGTGTTATTTTCTGTATTAACATCT<br>TGTTGCACGCATTTGAGGTCATCAGGGTGCAAAATTTGATTCTGAAAATGTCATATATTTTCATTAATA<br>AATAACCTAAATATGATAAAACATAAAGCAGTGTCTGGTTCATCTGGAATTTTGTGTACTTTAAATCTT<br>TCAGACTCAGCTACTGATAAATGAAACGTTACACAGGTGTGAACCAAAATCAAATAACCTCGACTGGTCT<br>ACTATCATAATCACCTGAACAGAACAAAACCTTTTCTCAGCTTAAAGAGTCCAGGGCTTCGGATAACAG<br>CTGCCATCTGCCACCTGCTACCATTGACCTACGTGAACACAGACATTCTGTCTCCACCTTGATGATGGGT<br>GGGCTGCTCCCTTTTCTTTGTTAAATTTTGTGCTTTCATCACATTTTCTCTATTCTGACCTCTGTTATGAG<br>AAATAAACGTCACTGATTCCA                                                                                                                                                                                                                                                                                                                            |
| <b>ING4</b>     | TAAGGGCCTTGGATTCCAACACAGTTTCTCCACATCCCCTGACTTGGGCTAGTGGGCAGAGGAATGCC<br>TGTGCTGGGGCCAGGGTTTACGGGAGGAGTGGATGGCACAGTGTGTATCCCTCTCCTCCCCTCCTCC<br>CCACTCCCGTGTGCTGAGGCTGCATCAGACCTGGTAGGGAGGGGTGCCGCAGCCACTAACGGTATGTG<br>CTCTCCTTCAGCCCTCTCCCTTCGGAGGGACGTGGTCTTGCCCACTGTCTTTTGCCTCCATGCTGAGGTC<br>GGTGTGATTTTTCAGAGGGAGGGTCTTTTTCATTCTCCTTGCTTTGATTTAAGGACTGGGGCATAGCAT<br>GGGGGACGTCCCCAGACCTTTCATTCCCCTCCTGTGGTGGGGCTAGGTGTGATCAACACTTTTCTT<br>CTCATTCCCTTCTGCTTTTTTTCATGGTGGGGATCCACCAGGTCTATAGGCTCTGGCCCTAGTTGAAG<br>GGGCACCCCTTCTCTGTGCCAAGAGGATTCATCTGGGAGAGGGGGCAAGGTGGAATGCAGATAACT<br>CACATGTAAGGAACCTGGTAGGTAATAAAAAGCTATACATGTTGGCCTGCTGTGTTTATTGTAGAG<br>ACACTGTTTTAGTAAACATGCTGAGCATT                                                                                                                                                                                                                                                                                                                                                                                                                                                                                         |
| <b>IRF3</b>     | CCCTCGCTCCTCATGGTGTGCTCCAACCCCTGTTCCCAACACCTCAACCAATAAACTGGTTCCTGCT<br>ATGATC                                                                                                                                                                                                                                                                                                                                                                                                                                                                                                                                                                                                                                                                                                                                                                                                                                                                                                                                                                                                                                                                                                             |
| <b>MAP1LC3B</b> | CCCATGTCGGGAAGGATGTGTGCTCTGACAGACGTGTGATGCTGGCAGAAGGGATTGGTTTTCTCCT<br>GTGTATACAGTGGAGGAGTCTGAGAAGCAGGGATGCCTGGGGTATCAGCTCCAACAGTGGCAGCA<br>GAGTGGTGGCTTCTCCTAGTTTGTGCTCCGTGTTCTGTGCTTCTAAGAAAAATGTGGGCT<br>GCTTTGAAAGTTATATAATTATCATTTTTTTTTTTTTTGAACAGGGTCTTGTCTATTGCCTAGGCTGGA<br>GCACAGTGGCATGATCTTGGCTCACTGCAACCTCCGCCTCTGGGTCAAGTGATTCTTCTGCCTCCACC<br>CCCCGAGTGGCTGGTATTACAAGCACATGCCACCACACAGGCTAATTTTTGTATTTTAGTAGAGACGG<br>GGTTTCACCATGTTGGCCAGGCTGGTCTCGAACTCCTGACCTCAGGTGATCCACCCACCTCGGCCTCCA<br>AAGTGTGGGATTACAGGCGTGAGCCACTGCATCCAGCCATATAACCGTATTCTAATAAAGAAATGGTT<br>GGCTTGATGATGGTTTTGTGTAATGAGCTAGAGATAAATTTAAGTGTCTTCTGTGGTATATGTGGGA<br>GGGCCATTAAGGAGTGGGTTTCACTCCCTGCATGTGGGCAGGTGTC                                                                                                                                                                                                                                                                                                                                                                                                                                                                               |
| <b>MFN1</b>     | AATAGAGATTGCTTTGGTGACCATGATAGGAGGAAACGAACTTGTAAAGATTGGAACAGTTGTTATTTT<br>TATGAAATTACTTTAAATATGAATTGTAATACTGTACTTAAATAGCAAAGCCCTGTGTAGATTCTGGTA<br>ATGATCTGTCTCAGGGTATGTATTTTTGAAGAGTGTATGTCCTTAGTTTTAATTTTGTAGTAAAGAAA<br>AGGCTAAAATCATGAATTAGTTACAAGCAACAGTACCAACTTATGTGACCCCTGAGGGGTGGGGCTGTG<br>AGCTCTAATTTGTTTTGATTCTGAAAACTCTGCTTCTGGCATCCAGGAGTTAGAGATTGAGCCTTTC<br>ATCTTCTTCTCAAACTAGTTTTGATGCTTCTTTCATGGGAATAGTCACTTTTTTATTAGTAAATCGC<br>ATTGCTGGAACCAAGGAGTGTGGAATGTCTTGAGTGTATTTATGCAAGTCACAGTCACGTTG<br>CCATCATGGCAGCTATGTGAAACACTAATAAATGTGTTTTACTTTTTATTCCCCTTAAACTGATGTAAA<br>ACAGGATAAAGGCTTGTATAGTCACTTATAAGTATCTGGGTCTAAGTAAATTTCTTAGATGTTTCTAAA<br>GAAACATTTTCACTTTGCTCCATTATGATTCCAATAAGGAACGCTTTCCTAGTGAATTTTAGGAGTAA<br>AGTTTGAAGAGATAAAAATAGCCAAAGATAGGAGACGTCTGAATTTTGAATGATAAACAGTGTGTTTT<br>AAAAAAGCTGTTGTTCTTCAGGAGGCATTTGCTAGGATATTGCTGGATTATACCCCATTTGGAGGCTTTT<br>AATTTTATTGTATGAATTTTCCAGGATTTCAATAAAAATTATTATTGATTTTTTACCTTAATGAAAGATT<br>TTGGGTTCAAATATCTTTTATATATAAAGCTGATTGAGTCTGTACATATGTAATTTATGCCTAGTGGAG<br>GTTCTGTTGACTTTCTCCCACTGTGGAAGAGGCCAGTTTTGCCTCCATTTGCACATTTTCACTTATTT<br>TCTGATCCATAAATAACATTTACAAAATTTCTCTTGAGCTGGTGGAAATGCCTCACCAGTTTC |
| <b>MLL10</b>    | CAAGACTTAGTGATAAACTGGGCTGTAGCTCAAGAGAAAAGTTGACACCTGAGAAACATCTAGAAAT<br>TGCCTATCCTGCTGTTCTAGCACCTCATCTGGCTGCCTTTGAGTCTTTTACTACAGCTATGAAGAAACG<br>CAACAAGAACTCAATGCACAACAAGGATTAATTGCTGCAAGGACATTCTGTAAGGCTTTGATTAGTT<br>TTCTTGTGCTTTGTTGCACTGAAATGGAATCCCATGCCCTACCCCTTACCCAGTTTTTTGAACATGG<br>AAAGAAAATTAATAACTTTTTAAAGTGACATAATTTACATGCAATATGTTTATCAACTCAAGAATTTAAT<br>ATAGTTGGTACACAAGTATTTGTTATAAATTTGGAGATGCAAAATAGCAAACTAAACTTGTCTCAT<br>TTACAACTACTTGATTTTATTGTACAAGTTGAAATATGCTCTTTTGGTTTACAGTATGCTTGTCTTA<br>AGTCAAATTCAGGAACATAATTTCTTCTCCTGGAGTTGCAATGATTGATTGATTACAAATATATAGCACAT<br>CACCTGGGACTTGGCAATCTTTGTTAAAAAAAATTTCTTTTCTAATGGGATTTGGCAATTTTGGTAAT<br>GAAGTTAGGATGGTAATGTCTGCATCTGCTAAAGGTAATTTCTTTTGAAGATTGCTTTCTTATGTTAA<br>GACCTACTCATATTTGAAGAAATCTTGTAGTTAAGTGTGTTCTGAGGCTGCTGGGGGAACAGATCAAT<br>TCAAAGCTAAATACTTTTTCAGAAAGGGCCACTGTGAAAGTGTGGTGGGGTTTGCCTTGATCAA<br>GTGCTCCATTGTGCTGCAAGGGCTGTAGACAGCAGGGTGGGACAGTCACTCCGAGCAGCAGGAA                                                                                                                                                                                                                              |

|              |                                                                                                                                                                                                                                                                                                                                                                                                                                                                                                                                                                                                                                                                                                                                                                                                                                                                                                                                                                                                                                                                                                                                                                            |
|--------------|----------------------------------------------------------------------------------------------------------------------------------------------------------------------------------------------------------------------------------------------------------------------------------------------------------------------------------------------------------------------------------------------------------------------------------------------------------------------------------------------------------------------------------------------------------------------------------------------------------------------------------------------------------------------------------------------------------------------------------------------------------------------------------------------------------------------------------------------------------------------------------------------------------------------------------------------------------------------------------------------------------------------------------------------------------------------------------------------------------------------------------------------------------------------------|
|              | TCATCCCGTCACTGCAGCCTTCCCATGCTCCGCCTTTATTCAGAACTTTCTGTGCCACTGTAGATAGCTC<br>AGGCAAAACTATTACCTGGGTATTTATCCACTAATGAGTCACAAGAAAAGGAGTGGATTTGGTAAGAAT<br>AGAGATTTGTTTTATTTAAACCACTTCCCATTACTGACCATTAAGCTCACCCTAGAGTTCCCTGAAACA<br>GGTGAAACCTGTATGACAGCCCTTCCACTTTGGGGAGCCACGCTTTTGATGTGACAGTACCGCAGAGTG<br>ATCCCCCACTGAGGATGTCATCATCAAACCTCTTCTTTGGTGTGTGAATTATTAGTGGAAAAGACCCAGC<br>TGTAATTAGACCTCCACTGTGACTTAGCTGGAAGAACATGTTAATTCTGCAATATGTTTCTTGGTAAAC<br>ATTGCACAGTTCTTACCTCATTTCTGTAATAAAGTTTTGTGAATCTGTTTTGTATTGTGACAAATTCATA<br>GATAACATTGATATTTGATTTGTAATATTTCTAATTGGTAGATTTAATTGAAAAGTAAATTAATTTATT<br>TTTATATGTTCCAGGGGAATTTAAAGTCAAATCTTTGTAGATAATTTAAAAAATCAGTGTGGTTTTATTT<br>ACTTATTTAACCCACTGGTTGTTATTCTGTAAACAGTTTGTATAAATGGTAAATTTGAATGTGTTGTTATT<br>TACCTAGATGTAATAATCCACATGTATTAATGTAACAAATGT                                                                                                                                                                                                                                                                                                                                                                 |
| <b>MxA</b>   | CCCACACTCTGTCCAGCCCCGTAGACGTGCACGCACACTGTCTGCCCCGTTCCCGGGTAGCCACTGGAC<br>TGACGACTTGAGTGCTCAGTAGTCAGACTGGATAGTCCGTCTCTGCTTATCCGTTAGCCGTGGTGATTTA<br>GCAGGAAGCTGTGAGAGCAGTTTGGTTCTAGCATGAAGACAGAGCCCCACCCTCAGATGCACATGAG<br>CTGGCGGGATTGAAGGATGCTGTCTTCTGACTGGGAAAGGGATTTTCAGCCCTCAGAATCGCTCCACCT<br>TGCAGCTCTCCCTTCTCTGTATTCTAGAAACTGACACATGCTGAACATCACAGCTTATTTCCCTATTTTT<br>ATAATGTCCCTTCAAAACCCAGTGTTTAGGAGCATGAGTGCCGTGTGTGCGCTCTGTCGGAGCCCT<br>GTCTCTCTCTGTAATAAACTCATTTCTAGCAGACA                                                                                                                                                                                                                                                                                                                                                                                                                                                                                                                                                                                                                                                                                     |
| <b>NOD1</b>  | AGGATGCTTCTGTTTCATGGGGTTTTGCCCTGGAGCCTCAGCAGCAAATGCCACTCTGGGCAGTCTTT<br>TGTGTCAGTGCTTAAAGGGGCCCTGCGCAGCGGGACTATCAGGAGTCCACTGCTCCATGTGCAAGC<br>CAGCTTCTGTGCAGAAAGTCTGGTCCGCAAACTCCCTAAGTACCCGCTACAATCTGCAGAAAAAGAA<br>TGTGCTTTCGAGCTGTTGTAGTTACAGTAAATACACTGTGAAGAGACTTTATTGCCTATTATAATTT<br>TTATCTGAAGCTAGAGGAATAAAGCTGTGAGCAAACAGAGGAGGCCAGCCTCACCTCATTCCAACACCT<br>GCCATAGGGACCAACGGGAGCGAGTTGGTCACCGCTCTTTTATTGAAGAGTTGAGGATGTGGCACAA<br>AGTTGGTGCCAAAGCTTCTGAATAAAACGTGTTGATGGATTAGTATTATACCTGAAATTTTTCTTCTT<br>CTCAGCACTTCCCATGTATTGATACTGGTCCACTTACAGCTGGAGACACCGGAGTATGTGCAGTGTG<br>GGATTTGACTCCTCAAGGTTTTGTGAAAGTTAATGTCAAGGAAAGGATGCACCACGGGCTTTTAATT<br>TTAATCCTGGAGTCTCACTGTCTGTGGCAAAGATAGAGAATGCCCTCAGCTCTTAGCTGGTCTAAGAAT<br>GACGATGCCTTCAAATGCTGCTTCCACTCAGGGCTTCTCTCTGCTAGGCTACCCTCTCTAGAAGGCT<br>GAGTACCATGGGCTACAGTGTCTGGCCTTGGGAAGAAGTATTCTGTCCCTCAAAGAAATAGGGCATG<br>GCTTGGCCCTGTGGCCCTGGCATCAAATGGCTGCTTTTGTCTCCCTTACCTCGTGAAGAGGGGAAGTCT<br>CTTCTGCTCCCAAGCAGCTGAAGGGTACTAAACGGGCGCAAGACTCAGGGGATCGGCTGGGAAC<br>TGGCCAGCAGAGCATGTTGGACACCCCCACCATGGTGGGCTTGTGGTGGCTCCTCAGGAGTGGG<br>GGGTGATACTACTAGATCACTGTCTCTTGCCAGCTCATTTGTTAATAAAACTGAAAACACTCTT |
| <b>PCSK7</b> | CCTCAGGGCCTGACAGTGTGGGACAGGCTCTCTTTCCAAAATTAGGGAGCTTTGACAGAAAAGCAGT<br>TCTGATGCTTACATCTGGAATCTGAGGCATCCTCTGACTCCACTCAAAGAGGGTGAGGGCCTTCTTAAGA<br>TACAAATGGTGGAGGATTGCTGCCAGAGAAGTCTGGTCAGAGCCACAGGGTCTGCCTCCAGCCAAACG<br>GGAGCTTTTGGTGAGAAGGTGTTGGACAGGGGATTGGCGCCCCCTTTGGTTTGGCCTCCATCCTCATC<br>TCTTTGGGCAAGCCAGCTGCCTAGGTCCTCAAGCATGGGGGACCCCTTCCACATATAAGTTGAGA<br>AGGTGCTGCCATAGCCAGGAGCGCATCTCAATGAAAACATCACTGGGGTCACTTGGGAAGAGGACTT<br>CGGGGTAGAGGCTGGGAGGAGCCCTGGACATGCCTGTCTGAAAGCGGCTGCCTCCATTATCCATTCC<br>CAAGATGCCTGATCAGAAAACCAACATGAATGAACCCCTGGCTCCTTACCACCCCAAGATTGGTATGA<br>TGCTGCCGGCACAGCTGGGATACACACGGCTCCCCAGGCCTGAGCTGCTTCACTAGGGAATCCTGCGG<br>CAGGACTGCAGAGCAGATGGCAGATGCACATGTTGGAGGAGAGAGCCTTGGGAGCCACTGCCATCCA<br>GTCTGCCACCCTGTCTTCTCTGCAAGTGTCAAGGAAATGGCCTTCCCGCCGAGCCAGTATC<br>TGCCTGACAGGCTGTGACTCTTCTCAACCTTGGCCTTCTCCCTCTTCTGAGCTAGTTGGTTGAATTTT<br>TTAATGCTTAAGATTTGTTTTCTTTTTACAGCAACATTTTCTTGAATTTTTTCTGCACAGCTTTTCCA<br>AAATAAAAACCTTCAA                                                                                                                                                                                               |
| <b>PTPN7</b> | [...]AACATGTGGGGACTACTCAGAGGCAAAGAGGAGTGTCTCTGCTCCATGGTTGCTGGCCACTCCC<br>ACCAACTACTTTAGGGAGGCTAAGCAGTCTGTTTTTGCTTCCATGGCTCAAATAATACCCTGGGTATG<br>CAGGACCACTATACCTTGCAATTTGCTGAGTACACCTAGAGAGCTTGGCTGTTTCCAAAAACAATCAGGG<br>TCATAACCATCCATGCAGACATGGAGGCTCGGCTGAACCAGGACTCCTCACTGTCTACCTGAGAGAATG<br>AGCACCCCTCATCCATCTCAGCATCAACAAATTTCCAGGGGACCTCAGGTCTACCTCAGGACTGAACGC<br>CACACCTCAGGATTCCTCTCTTGAATCTGAGACTGGCTGCCATTCTGAGATGGGGATGAAGGTAAG<br>ATGCCGCATCACCAGGCACGCCCCCTGACAGCTGCCTTGATAACAGCTCTCTGTGAAACCCCGAG<br>GAGTTGGATCTGGAGAACAGCTGGCCCTCCTCACTCAGGACTTCTCTCTGAGAACAACAGCAGTGTAA<br>AACTGAGGATGATTTCCCTAATGCTTCTGCTTGGCCTTATGGAGGAGCTGCTCCTTCTACAGCCTTGG<br>GGATGGACTTGGCCACACCTCCACTCCCTGAGCCCTGTGAGAGGCACGACTGTCTATGCCAATGAGG<br>CTCGGTGGGGGGCTCTCAAGTGCCTGATCCTGCCCTGGGCTCAGAGCCAGCCAGAGGGGAAGCAACTG<br>CACAGCCCCACAGGCCCTCCCTGGCACTGTCCCCCAACCCATCTCAGAGCTCAGAGGGTACAAGCTCC<br>AGAACAGTAACCAAGTGGGAAAATAAAGACTTCTTGGATGACTGACTC                                                                                                                                                                                                                            |
| <b>RAB1B</b> | AGGGGCACATGGAGTGGGACAGGAGGGGCACCTTCTCAAATGATGTCCCTGGAGGGGACAGGAGG<br>TGCTCCCTTCTCTCTCTGGGGCATTGAGTCTGTGGCTTTGGGGTGTCTGGGCTCCCATCTCCCTC                                                                                                                                                                                                                                                                                                                                                                                                                                                                                                                                                                                                                                                                                                                                                                                                                                                                                                                                                                                                                                     |



|              |                                                                                                                                                                                                                                                                                                                                                                                                                                                                                                                                                                                                                                                                                                                                                                                                                                                                                                                                                                                                                                                                                                                                                                                                                                                                                                                                                                                                                                                                                                                                                                                                                                                             |
|--------------|-------------------------------------------------------------------------------------------------------------------------------------------------------------------------------------------------------------------------------------------------------------------------------------------------------------------------------------------------------------------------------------------------------------------------------------------------------------------------------------------------------------------------------------------------------------------------------------------------------------------------------------------------------------------------------------------------------------------------------------------------------------------------------------------------------------------------------------------------------------------------------------------------------------------------------------------------------------------------------------------------------------------------------------------------------------------------------------------------------------------------------------------------------------------------------------------------------------------------------------------------------------------------------------------------------------------------------------------------------------------------------------------------------------------------------------------------------------------------------------------------------------------------------------------------------------------------------------------------------------------------------------------------------------|
| <b>SOCS3</b> | <p>GGGAAGGGCGCAAAGGGCATGGGTCGGGAGAGGGGACGCAGGCCCTCTCCTCCGTGGCAGATGGCA<br/>         CAAGCACAAGAAGCCAACCCAGGAGAGAGTCTGTAGCTCTGGGGGAAAGAGGGCGGACAGGCCCT<br/>         CCCTCTGCCCTCTCCCTGCAGAATGTGGCAGGCGGACCTGGAATGTGTTGGAGGGAAGGGGAGTACC<br/>         ACCTGAGTCTCCAGTTCTCCGGAGGAGCCAGCTGTCTGGTGGGACGATAGCAACCAAGTGGATTC<br/>         TCCTTCAATTCCTCAGCTTCCCCTCTGCCTCCAACAGGGGACACTTCGGGAATGTGAACTAATGAGAA<br/>         CTGCCAGGGAATCTTCAAACCTTCCAACGGAACCTGTTTGTCTTTGATTTGGTTAAACCTGAGCTGGTT<br/>         GTGGAGCCTGGGAAAGGTGGAAGAGAGAGAGGTCTGAGGGCCCCAGGGCTGCGGGCTGGCGAAGG<br/>         AAATGGTCACACCCCCCGCCACCCAGCGAGGATCCTGGTGACATGCTCCTCTCCCTGGCTCCGGG<br/>         AGAAGGGCTTGGGGTGACCTGAAGGGAACCATCTGGTGCCACATCCTCTCCCTCCGGGACAGTCACC<br/>         GAAAAACAGGTTCAAAGTCTACCTGGTGCTGAGAGCCAGGGCCCTTCTCCGTTTTAAGGGGAA<br/>         GCAACATTTGGAGGGGACGGATGGGCTGGTCTCCTTTTCTACTACTATACTTCTGT<br/>         ACCTGGGTGGATGGAGCGGGAGGATGGAGGAGACGGGACATCTTTCACCTCAGGCTCTGGTAGAGA<br/>         AGACAGGGGATTCTACTCTGTGCCTCTGACTATGTCTGGCTAAGAGATTGCTTAAATGCTCCCTGTC<br/>         CCATGGAGAGGGACCCAGCATAGGAAAGCCACATACTCAGCTGGATGGGTGGAGAGGCTGAGGGAC<br/>         TCACTGGAGGGACCAAGCCAGCCACAGCCAGGGAAGTGGGGAGGGGGGCGGAAACCCATGCCTC<br/>         CCAGCTGAACACTGGGAATGTCAGCC</p>                                                                                                                                                                                                                                                                                                                                                                                      |
| <b>TGM4</b>  | <p>CTTGTCTGATGCTGTGGAGCCTTAGTTGAGATTTTCAGCATTTCTACCTTGTGCTTAGCTTTCAGATTATG<br/>         GATGATTAATTTGATGACTTATATGAGGGCAGATTCAAGAGCCAGCAGGTCAAAAAGGCCAACACAA<br/>         CCATAAGCAGCCAGACCCACAAGGCCAGGTCTGTGCTATCACAGGGTCACTCTTTTACAGTTAGAAA<br/>         CACCGCCGAGGCCACAGAATCCCATCCCCTTCTGAGTCATGGCCTCAAAAATCAGGGCCACCATTGTC<br/>         TCAATTCAAATCCATAGATTTGGAAGCCACAGAGTCTCCTGGAGCAGCAGACTGCGGACGCCAG<br/>         TGCTGCCACCTGCTGACGACCTTGAGAAGCTGCCATATCTCAGGCCATGGGTTACCAGCCCTGAAG<br/>         GCACCTGTCAACTGGAGTGCTCTCAGCACTGGGATGGGCTGATAGAAGTGCATTCTCCTCTATTGC<br/>         CTCCTTCTCCTCTCTATCCCTGAAATCCAGGAAGTCCCTCTCCTGGTGTCCAAGCAGTTTGAAGCCC<br/>         AATCTGCAAGGACATTTCTCAAGGGCCATGTGGTTTTGCAGACAACCTGCTCAGGCCYGAACTCACC<br/>         ATAGAGACCCATGTCAGCAAACGGTGACCAGCAAATCCTTCCCTTATTCTAAAGCTGCCCCTTGGGAG<br/>         ACTCCAGGGAGAAGGCATTGCTTCTCCTGGTGTGAACCTTTCTTTGGTATTCCATCCACTATCCTGGC<br/>         AACTCAAGGCTGCTTCTGTTAACTGAAGCCTGCTCTTCTTGTCTGCCCTCAGAGATTTGCTCAAATGA<br/>         TCAATAAGCTTTAAATTAACCT</p>                                                                                                                                                                                                                                                                                                                                                                                                                                                                                                                                                                                                                |
| <b>TMED2</b> | <p>AAGCCTTCTCCTGATGATCCCAACTCAGAATTCAGTGTAAACCAACACCTTGGTCATAATAATGTCATTA<br/>         GTTTCTCCATTTTTATTTCTGAACTGTACATTCACTTATGTTTCTTTGAGATTAATAGATATTGGGGG<br/>         AAAAAAGCCTTTTTAGGAAAATTATAGTAAAAATTTGACAGTTGATTGGCATAATTTCTGTTTGAATGC<br/>         TGCCTCCATTATATAGGTCCTTCCAGGAACTCAAACTGTAAGTGAATATGGGAGTATGTTTTTATT<br/>         ATTTCTTCTTTTCTTTTGTTCATAATAATGCAGTTTGTTCAGGAAATCAGCACAAGCCTGATAGTA<br/>         CTTTACTAAAATGACTGCATTCTTTGGATTCTTCTCAGTCTATGGTTCAAGTCACTAAAGATTCATTTTTGT<br/>         GAGTCTTATGAGAAACAGCAGTATGAATCTTGACGGTTTCTGCCCGTCTAATGGCAGAGCTCTGAC<br/>         TTGGGTGATGCTGCCAGGCTGGGTACTTTCATACTTTGTTTTCTGTTTTGCTTAAAACTACGACTCAG<br/>         CATACTTTCCACATACTTTTACATTGTACCTTAGGACTCAGTCATCTCCACTTAAATGATGACACA<br/>         AGCAGCTAATAACCATTCTGGGTTTCTGCCTAACCCCTAATTGTCTGTTAAAGCCAATTCTCTGGGTG<br/>         CCCAGTGAGTGGTGGCTTTTTTCTTCCACATTGGCACATTCATCTCCACTCTGGCATGTAAGAAA<br/>         TAAGCATTACATAATTGGAATACTGGATTCTGATGCCAAAGGGTTAAAGCTTCTGGATTCATTTT<br/>         ATTGATATACAGCCACTATTTATTTTGTATCAGTGGCCTTTGGGCCACTGTTCAAGGTTACTGACCATCAG<br/>         TGTACGATTAGGGTTTTGGTTTTGTTCTTTGGGTATTTCTTTTTGGCACATGTAATCTGTTTTGT<br/>         GTAATAAGAAATTAATTTCTTCTGTTCTGATGATGGGTTAAAATTAAGAGCATTCCGGTTTTGGTAT<br/>         GGGGATGATCCAGGATTATGTTGTGACTGATACATATTAGTTACTTGTGTTTTTTTTTTTTTTGGATCT<br/>         TTGCAAGGGCAAACACTACAAGTAACGAGTTTTATATAATTAATTAATTTGTTACAGTTTTTATGTTCA<br/>         GGATAAACCATACTTCCACCTTGGGTGAGAACACTTGAACAGTTTATTAATGAGGTGACTTTCACCTTA<br/>         GGACAACCTGTTGCATGCCAAGTTTTTGTGTGTGTAACACTTCAAACTGATTTAAAGATGTAATTT<br/>         TAAAATTGGTTGATCTAATATGCCCCAGTTTCGGTAA</p> |
| <b>TRPC5</b> | <p>TCAAGCCCTAATCATCTGTTCTGGAACCTCAACAGAAATCTGTAATTTCTTGTCTCAGAGGTGACACAG<br/>         AATATGATTCCTCACTGCCCTGCCCCAGAAAGGAGAGTGAACCTTATTTGCACCATCTTTATAG<br/>         CCACATTCCTCATTTTTGTTCTGTTTTATTACTTTTATTATTGCTTTTTAATACCTATACACACT<br/>         AAGTCCATCTTACAACCGACTGAAGGGGTGTTGCACCTAATCATCAGAGGTGAGTTGGGTGCTTAAAC<br/>         TTTTTGCTTTGCTTTTCTACCCATGCTTCTTGAAGCCCCAGGTGCCACTTTGCTGGTCTTGTGCCGCAC<br/>         AGATTCCTGACCATCCTCAGAATCTCATGCCATTTTCCCGCAGAGCTGAGGGATGTGGTCAAGTCCCC<br/>         ACCAGTATCAGATAAGGCAAACACTACCCTGCCATCTTTGTTGCCATTGCTGCTACGCGCTCCCATG<br/>         TGGGTCAATGAACAGCATCAAAGGGAGGCTGAAGAGATTTCAAAGAATTGTCAGCTTGTGGTTTTCTGG<br/>         GTATAAGTGGCTTGTTCGTTCTTAAATACTACAACCTTCTATTGTTGGGGGCTATTGAGTTTTCTGTTCT<br/>         TAAAGATGTGTAGTTTCTAATGTGTGCCAATGAAATATTTACCCCATAGTATATGTCATATCTAATAAG<br/>         TTAGGCGAATATTTTTCTGTTTGTGTGTTTTCAGTTAACTTACTACATTTGAAAATTTGATAGTATCAAAA<br/>         [...]TGAACAACCTAGGTCTGAGTCTAGAGATTACATAAATAGTGTGTAGCCCAGAAAAGTAAATA<br/>         GGTGTCACGCTGTTTTTTTTAATGTCAACCAATAGGAATCCATTTAGATTAATGTATGTAATTTCTGAT<br/>         AAAAGTAAGAGAAATGAGGAACCTTTCGAACTGCAAATATGCCTCAAACCTAGCTTTTGATAAGTGTGGT</p>                                                                                                                                                                                                                                                                                                                                                                                                                                                                    |

|  |                                                                                                                                                                                                                                                                                                                                                                                                                  |
|--|------------------------------------------------------------------------------------------------------------------------------------------------------------------------------------------------------------------------------------------------------------------------------------------------------------------------------------------------------------------------------------------------------------------|
|  | TTCTGTTATTTGAATGGATTCCCATCTTTGTCTCTAGCCTGGAGAAGAGCAAATGGAGGGGGAGGGGC<br>CAGAAATAGGAGGAGGTTTTGAAGAATAAAGCCTCATATCCAGGAAAAAGTGATCAAGTAAAAAGCT<br>GCATCAAGACCCATTTGGCAAGAGGTTGTCCGAAAATAATTCCTTGATCATATCTGAAGTGGTTATTTAC<br>TCAATCAATTTCTCCCCTGCTTCGCTAAGACTGTCATAAAATGGCCTTGACATTTAATCACAGGTTACTT<br>TCCAGAAAGGTTTCTAAAGTTACAGATTCAGCTTTTCAAATTGTCAAATTCACITTTGAATAATAATAGAAC<br>CTGGGCTACATTCCTAACTCATATTAACAGCAC |
|--|------------------------------------------------------------------------------------------------------------------------------------------------------------------------------------------------------------------------------------------------------------------------------------------------------------------------------------------------------------------------------------------------------------------|
